# Supplementary material for: Characterization of Toxoplasma gondii subtelomeric-like regions: identification of a long-range compositional bias that is also associated with gene-poor regions
Source: PubMed Central journal article supplement (PMC4008256; doi:10.1186/1471-2164-15-21), 2014-01-13

**A**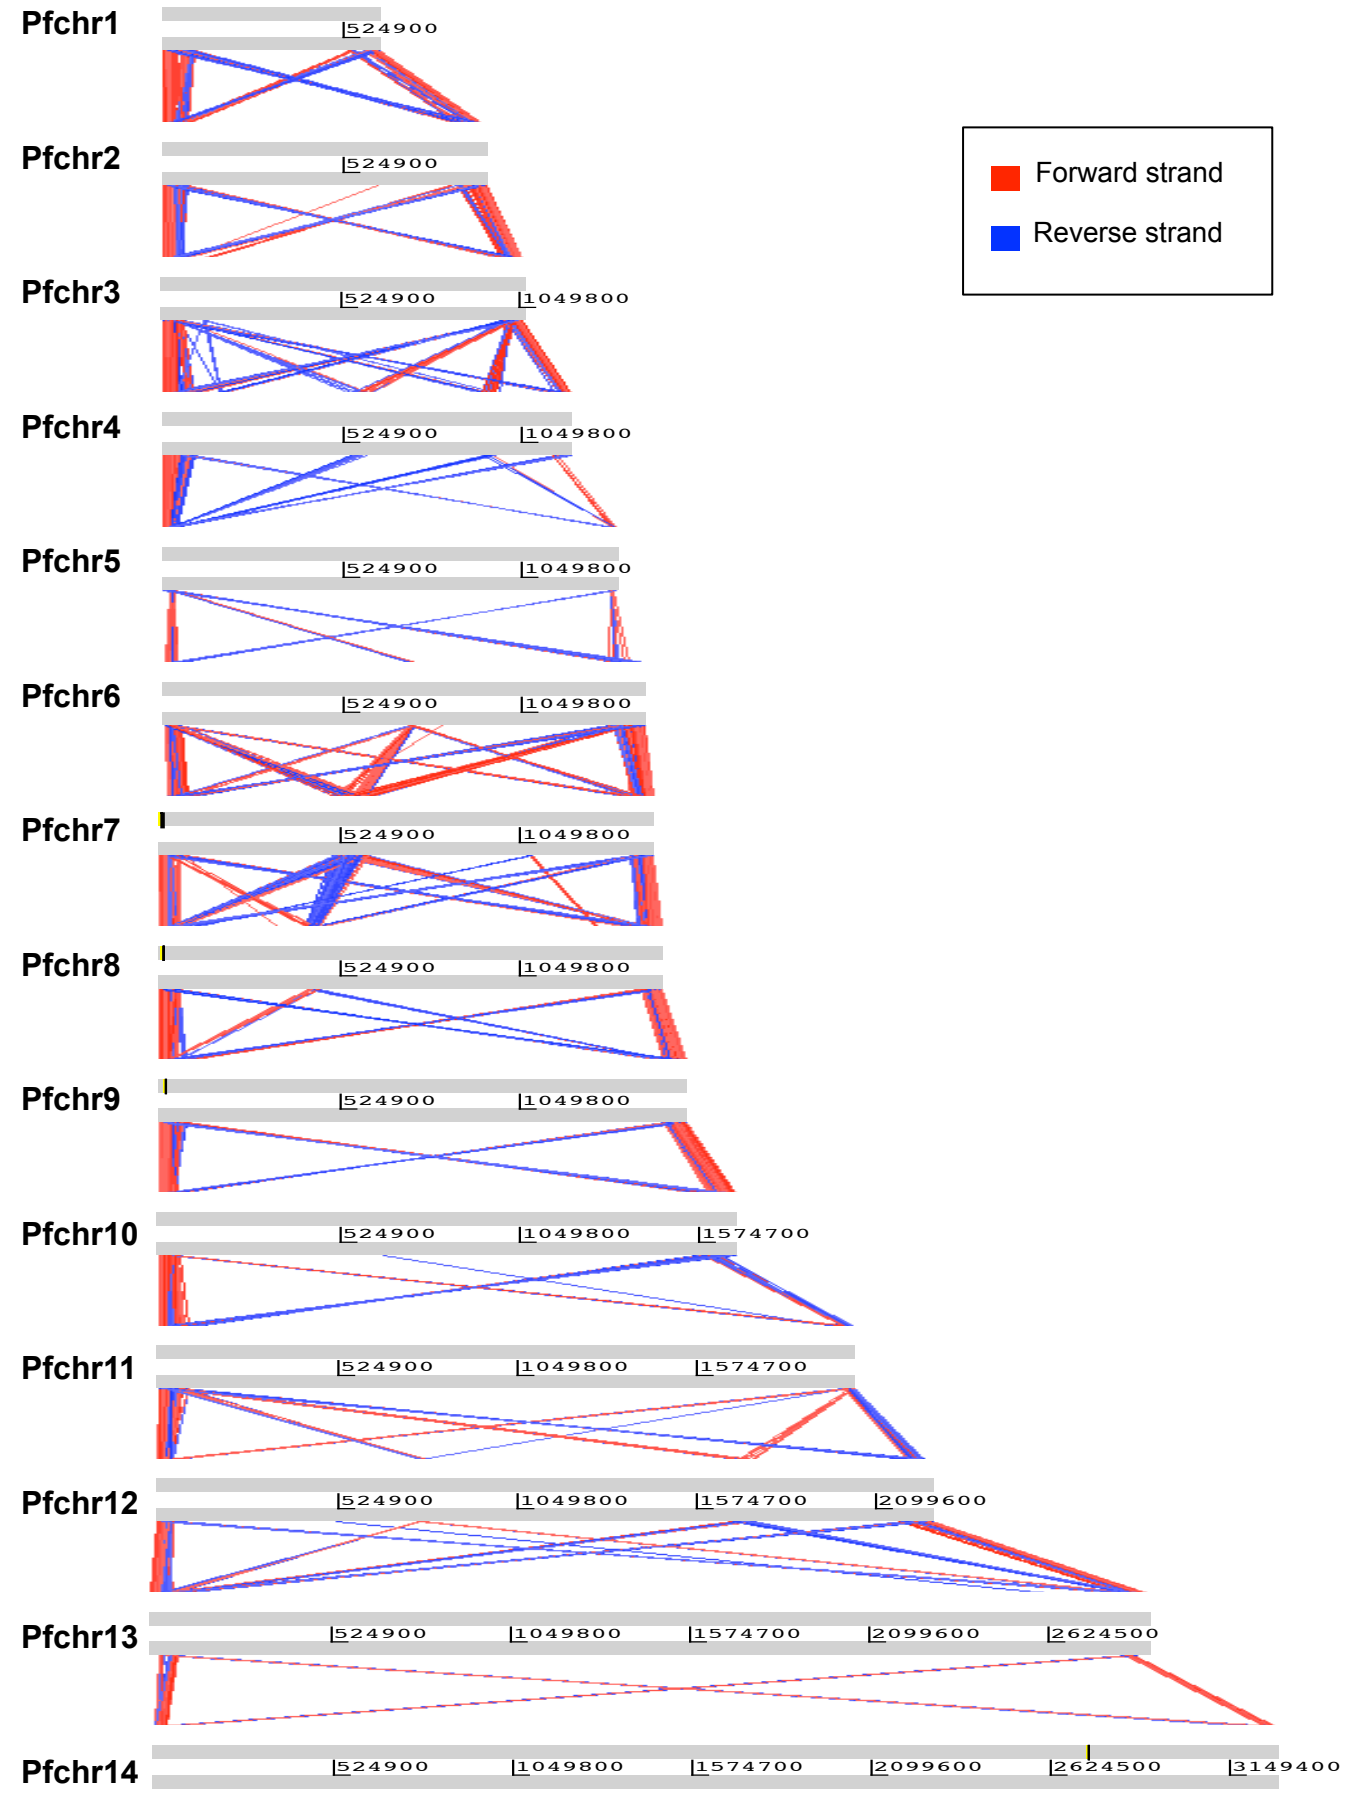

# B

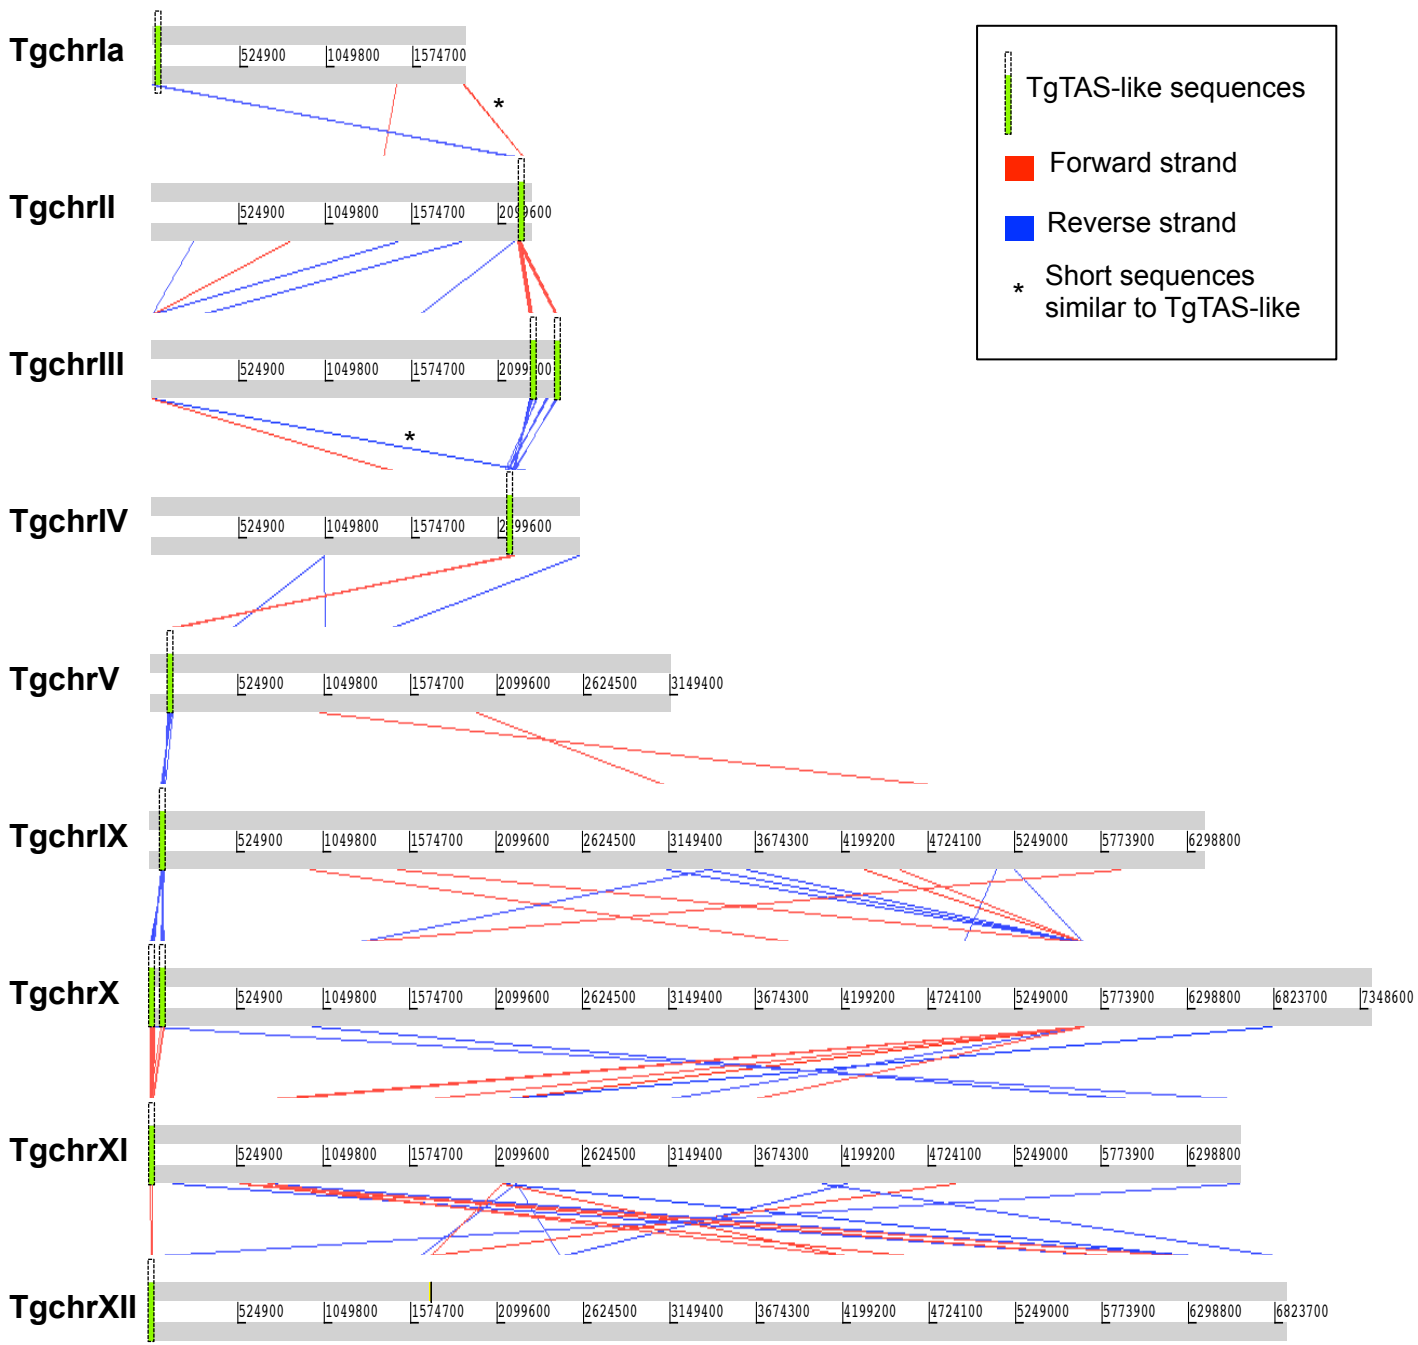

Supplement: 12864_2013_7001_MOESM1_ESM.pdf [file 12864_2013_7001_MOESM1_ESM.pdf]
