# Supplementary material for: Characterization of Toxoplasma gondii subtelomeric-like regions: identification of a long-range compositional bias that is also associated with gene-poor regions
Source: PubMed Central journal article supplement (PMC4008256; doi:10.1186/1471-2164-15-21), 2014-01-13

# CA of Genome Trinucleotide Composition for 1 K fragments

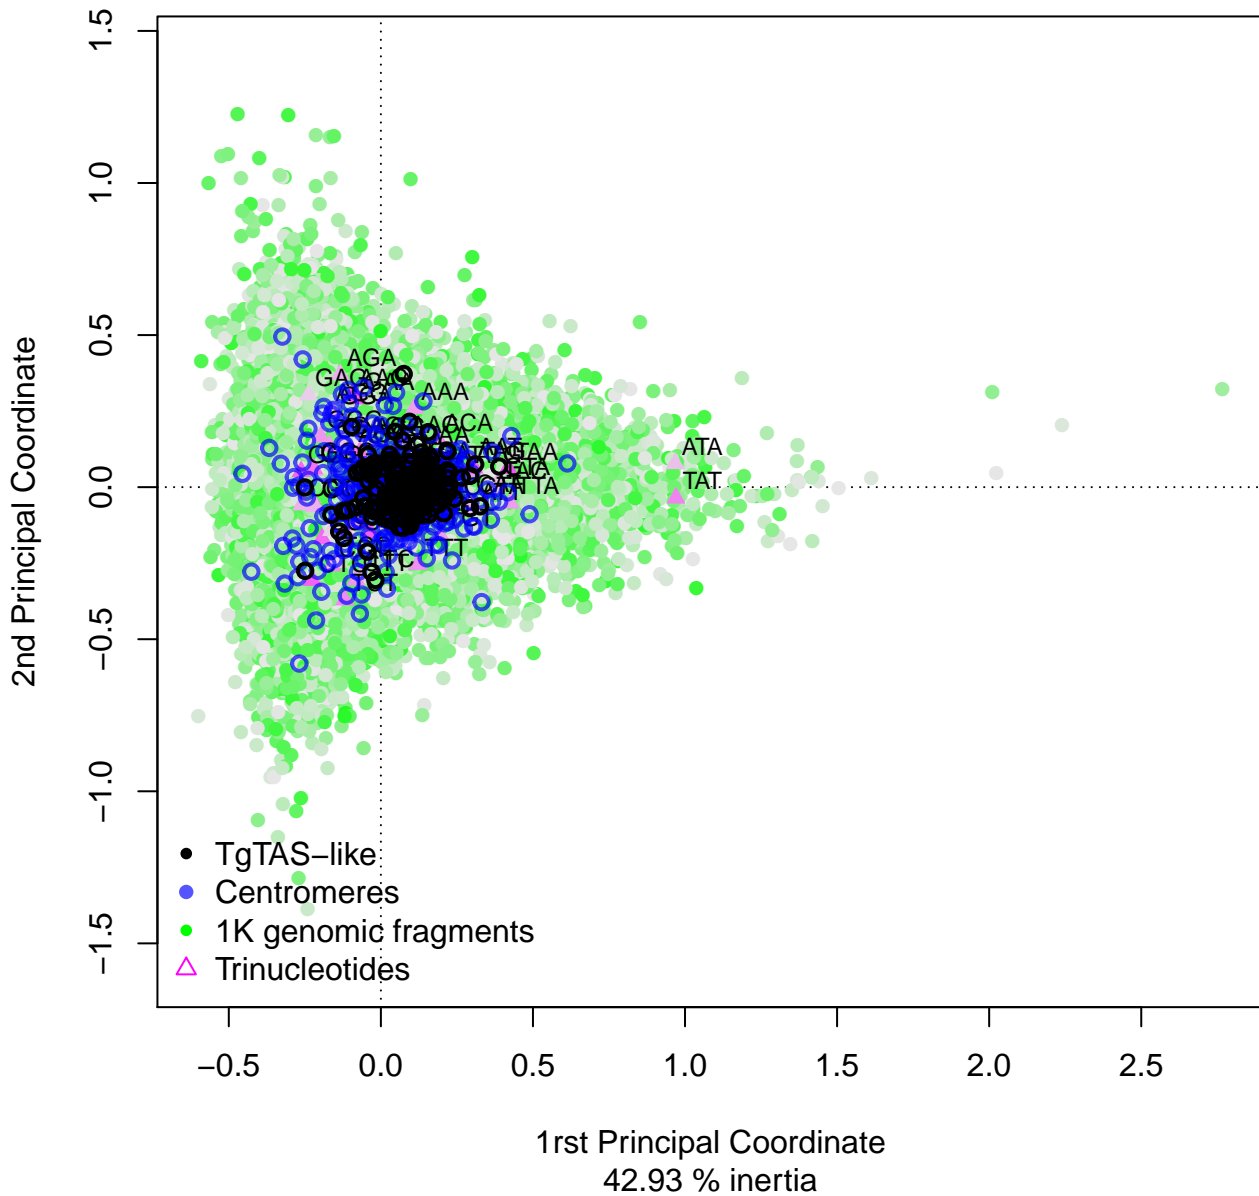

# CA of Genome Trinucleotide Composition for 5 K fragments

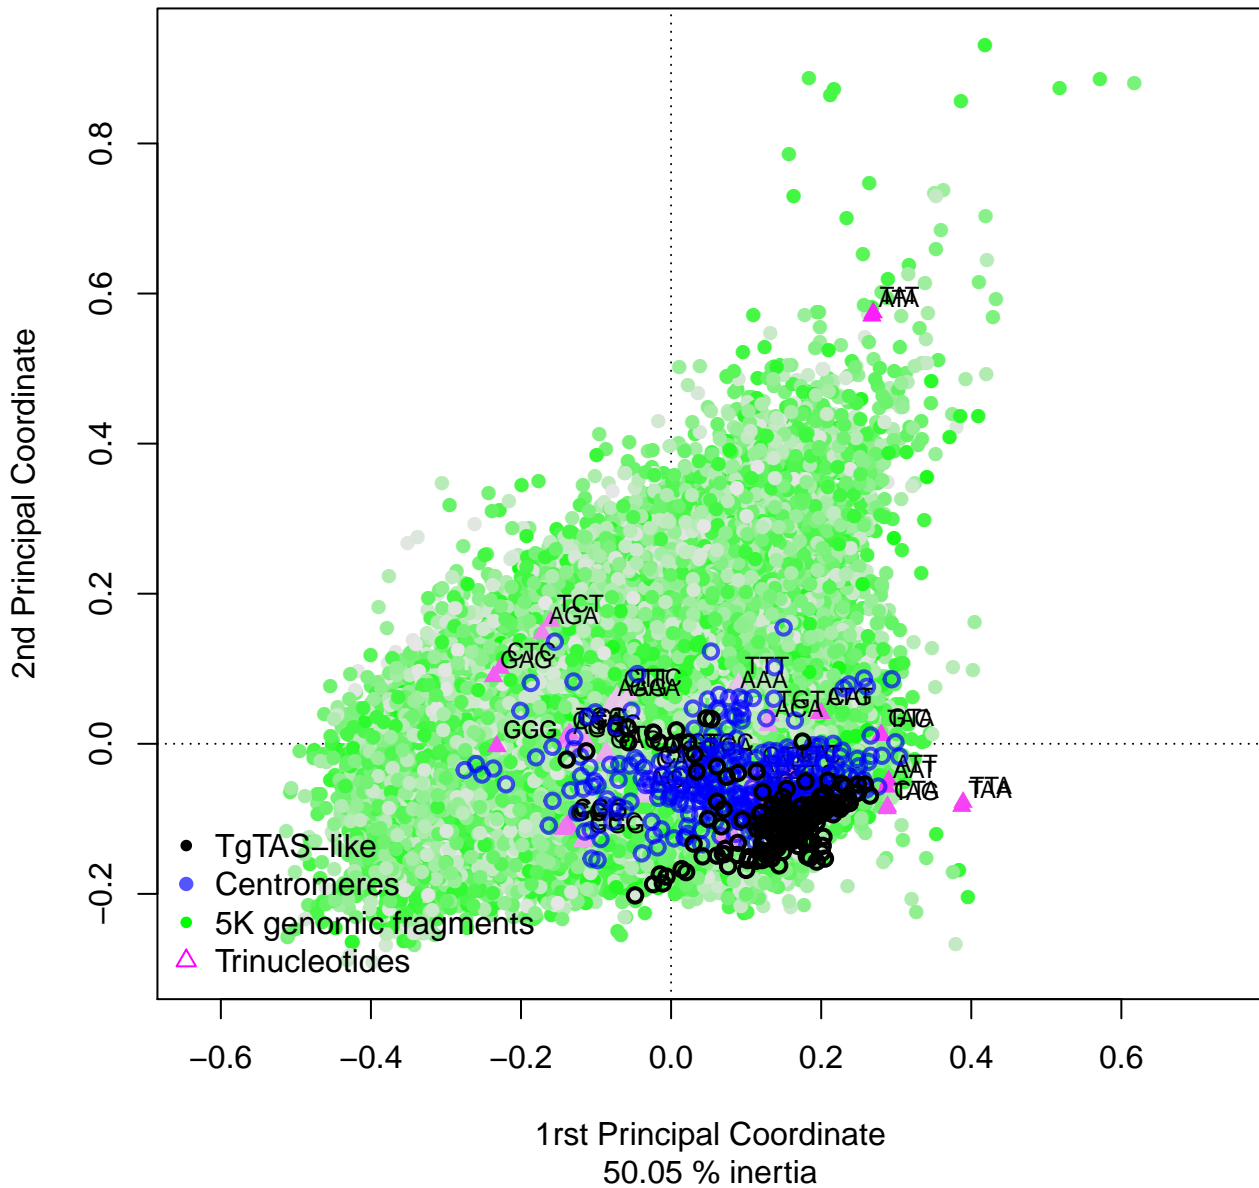



# CA of Genome Trinucleotide Composition for 20 K fragments

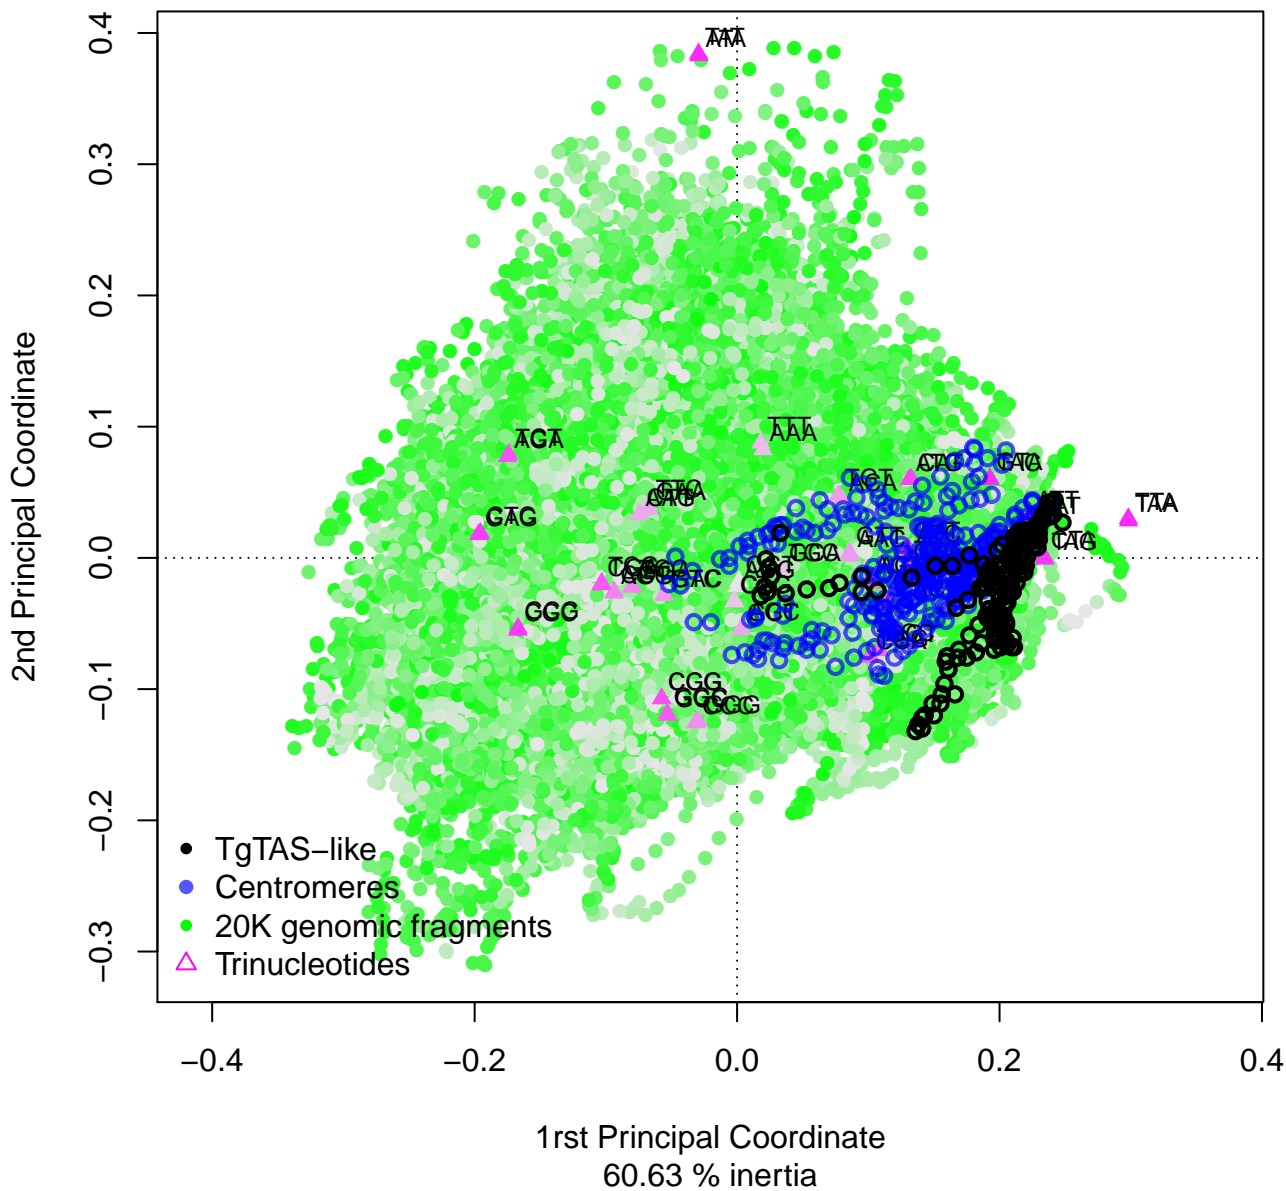



# CA of Genome Trinucleotide Composition for 40 K fragments

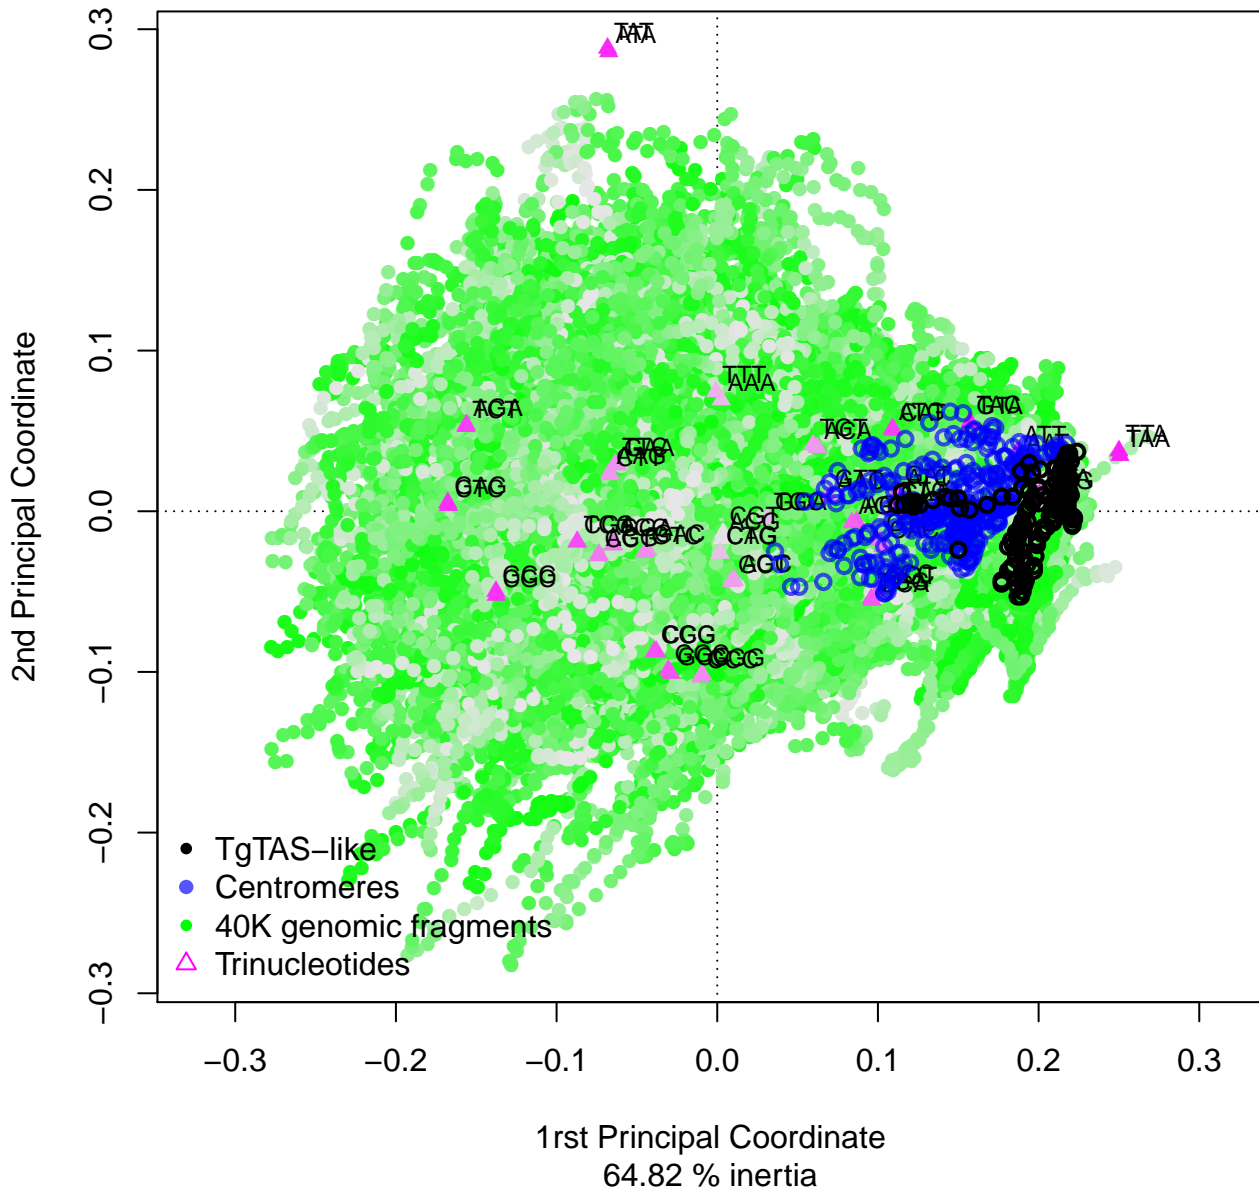

# CA of Genome Trinucleotide Composition for 50 K fragments

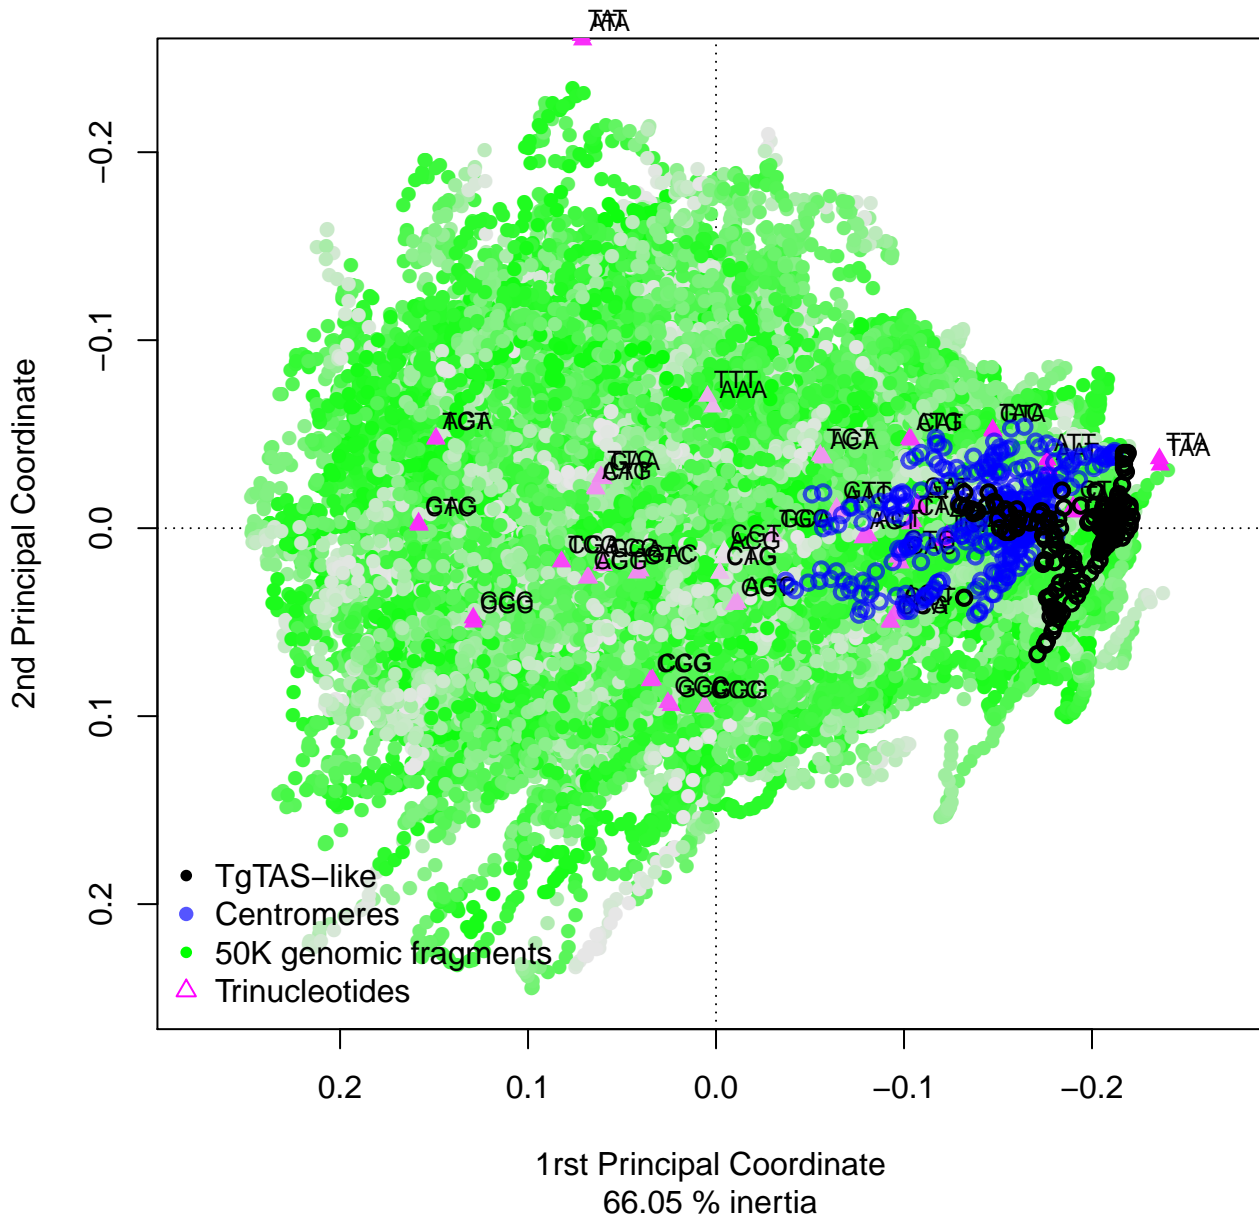

Supplement: 12864_2013_7001_MOESM6_ESM.pdf [file 12864_2013_7001_MOESM6_ESM.pdf]
